# Supplementary material for: MicroRNA-29c Acting on FOS Plays a Significant Role in Nonalcoholic Steatohepatitis Through the Interleukin-17 Signaling Pathway
Source: Front Physiol. 2021 Apr 1;12:597449. doi: 10.3389/fphys.2021.597449 (PMC8078210; doi:10.3389/fphys.2021.597449)
Supplement: Supplementary file 1 [file Table_1.XLSX]

## Sheet: Additional files1Table.S1
Table.S1: gene ontology biological process analysis result.
Pathway	Total	Expected	Hits	P.Value	FDR
positive regulation of transcription from RNA polymerase II promoter	800	13.6	70	1.92e-31	1.57e-28
transcription from RNA polymerase II promoter	1930	32.8	103	4.93e-29	2.02e-26
regulation of transcription from RNA polymerase II promoter	1610	27.3	90	2.93e-26	8e-24
positive regulation of RNA metabolic process	1330	22.7	81	1.12e-25	2.31e-23
positive regulation of transcription, DNA-dependent	1260	21.4	78	3.42e-25	4.14e-23
positive regulation of transcription, DNA-dependent	1260	21.4	78	3.42e-25	4.14e-23
positive regulation of nucleobase-containing compound metabolic process	1490	25.3	85	3.53e-25	4.14e-23
positive regulation of cellular metabolic process	2530	43	110	1.09e-23	1.12e-21
positive regulation of metabolic process	2690	45.8	112	1.46e-22	1.33e-20
transcription initiation from RNA polymerase II promoter	219	3.72	29	6.56e-18	5.38e-16
negative regulation of nucleobase-containing compound metabolic process	1130	19.2	63	1.08e-17	8.04e-16
regulation of transcription, DNA-dependent	3770	64.2	126	1.59e-17	9.32e-16
regulation of transcription, DNA-dependent	3770	64.2	126	1.59e-17	9.32e-16
regulation of transcription, DNA-dependent	3770	64.2	126	1.59e-17	9.32e-16
negative regulation of transcription, DNA-dependent	987	16.8	58	2.58e-17	1.32e-15
negative regulation of transcription, DNA-dependent	987	16.8	58	2.58e-17	1.32e-15
negative regulation of RNA metabolic process	1020	17.4	59	3.22e-17	1.53e-15
regulation of RNA metabolic process	3900	66.4	128	3.36e-17	1.53e-15
regulation of nucleobase-containing compound metabolic process	4540	77.2	140	4.95e-17	2.14e-15
viral reproductive process	597	10.2	44	1.06e-16	4.37e-15
negative regulation of cellular biosynthetic process	1220	20.8	63	4.72e-16	1.84e-14
DNA-dependent transcription, initiation	257	4.37	29	5.23e-16	1.95e-14
negative regulation of biosynthetic process	1240	21.1	63	1.03e-15	3.57e-14
negative regulation of transcription from RNA polymerase II promoter	552	9.39	41	1.04e-15	3.57e-14
intracellular receptor mediated signaling pathway	270	4.59	29	1.96e-15	6.42e-14
reproductive process	1740	29.7	75	6.62e-15	2.09e-13
interaction with host	426	7.25	35	8.14e-15	2.47e-13
regulation of gene expression	4480	76.2	134	9.55e-15	2.8e-13
regulation of sequence-specific DNA binding transcription factor activity	372	6.33	32	3.59e-14	1.01e-12
RNA biosynthetic process	4930	83.9	141	3.82e-14	1.04e-12
reproduction	1860	31.5	76	5.46e-14	1.44e-12
viral reproduction	803	13.7	47	5.68e-14	1.46e-12
response to endogenous stimulus	1360	23.2	63	8.24e-14	2.05e-12
transcription, DNA-dependent	4830	82.2	137	3.27e-13	7.67e-12
transcription, DNA-dependent	4830	82.2	137	3.27e-13	7.67e-12
intracellular steroid hormone receptor signaling pathway	113	1.92	18	6.06e-13	1.38e-11
cellular nitrogen compound biosynthetic process	5610	95.4	149	2.03e-12	4.49e-11
multi-organism process	1710	29	69	2.39e-12	5.16e-11
regulation of cell differentiation	1290	21.9	58	3.17e-12	6.65e-11
negative regulation of metabolic process	1820	31	71	5.89e-12	1.21e-10
negative regulation of cellular metabolic process	1660	28.3	67	6.72e-12	1.34e-10
response to organic substance	2500	42.5	86	1.21e-11	2.36e-10
positive regulation of cellular process	4780	81.3	132	1.28e-11	2.44e-10
regulation of developmental process	1880	31.9	71	2.46e-11	4.59e-10
RNA metabolic process	6010	102	153	3.17e-11	5.77e-10
regulation of cellular metabolic process	6120	104	154	6.73e-11	1.2e-09
regulation of cell proliferation	1430	24.3	58	1.95e-10	3.4e-09
positive regulation of sequence-specific DNA binding transcription factor activity	198	3.37	19	1.17e-09	1.99e-08
response to hormone stimulus	751	12.8	38	1.38e-09	2.3e-08
positive regulation of biological process	5500	93.5	139	1.94e-09	3.19e-08
gland development	303	5.15	23	2.06e-09	3.31e-08
positive regulation of cell differentiation	571	9.71	32	2.78e-09	4.38e-08
regulation of apoptotic process	1540	26.1	58	3.08e-09	4.76e-08
response to chemical stimulus	3830	65.2	107	4.26e-09	6.47e-08
regulation of programmed cell death	1550	26.4	58	4.75e-09	7.08e-08
tissue development	1680	28.7	61	5.54e-09	8.11e-08
response to steroid hormone stimulus	267	4.54	21	5.7e-09	8.2e-08
cell proliferation	1900	32.4	66	6.01e-09	8.5e-08
negative regulation of biological process	4590	78.1	121	6.53e-09	9.08e-08
negative regulation of cellular process	4110	69.8	111	1.2e-08	1.63e-07
protein import into nucleus	228	3.88	19	1.22e-08	1.63e-07
regulation of multicellular organismal process	2480	42.2	78	1.23e-08	1.63e-07
regulation of cell cycle	886	15.1	40	1.25e-08	1.63e-07
chromatin modification	512	8.71	29	1.3e-08	1.67e-07
positive regulation of developmental process	817	13.9	38	1.38e-08	1.74e-07
androgen receptor signaling pathway	67	1.14	11	1.53e-08	1.89e-07
nuclear import	232	3.95	19	1.62e-08	1.99e-07
regulation of molecular function	2250	38.2	72	2.82e-08	3.39e-07
response to abiotic stimulus	876	14.9	39	2.86e-08	3.39e-07
response to hypoxia	245	4.17	19	3.92e-08	4.59e-07
positive regulation of protein metabolic process	1080	18.4	44	4.81e-08	5.55e-07
organ development	3290	56	93	5.6e-08	6.37e-07
regulation of metabolic process	6920	118	158	1.12e-07	1.26e-06
chromatin organization	637	10.8	31	1.28e-07	1.42e-06
innate immune response	638	10.9	31	1.33e-07	1.45e-06
positive regulation of cellular protein metabolic process	968	16.5	40	1.39e-07	1.5e-06
regulation of viral reproduction	122	2.07	13	1.54e-07	1.64e-06
viral infectious cycle	241	4.1	18	1.59e-07	1.68e-06
intracellular protein kinase cascade	1140	19.3	44	1.89e-07	1.96e-06
protein import	272	4.63	19	2.04e-07	2.07e-06
apoptotic process	2130	36.2	67	2.07e-07	2.07e-06
apoptotic process	2130	36.2	67	2.07e-07	2.07e-06
nuclear transport	392	6.67	23	2.46e-07	2.43e-06
programmed cell death	2160	36.7	67	3.32e-07	3.24e-06
cellular response to stress	1620	27.6	55	3.69e-07	3.56e-06
histone modification	312	5.31	20	3.86e-07	3.68e-06
response to drug	344	5.85	21	4.39e-07	4.14e-06
enzyme linked receptor protein signaling pathway	1180	20	44	4.83e-07	4.46e-06
positive regulation of cell cycle	113	1.92	12	4.84e-07	4.46e-06
positive regulation of response to stimulus	1550	26.4	53	4.94e-07	4.5e-06
covalent chromatin modification	320	5.44	20	5.77e-07	5.2e-06
regulation of mitotic cell cycle	351	5.97	21	6.11e-07	5.44e-06
protein targeting	545	9.27	27	6.3e-07	5.55e-06
myeloid cell differentiation	296	5.03	19	7.47e-07	6.52e-06
nucleocytoplasmic transport	388	6.6	22	8.09e-07	6.98e-06
organ morphogenesis	966	16.4	38	1.02e-06	8.68e-06
anatomical structure formation involved in morphogenesis	2090	35.5	64	1.14e-06	9.64e-06
transforming growth factor beta receptor signaling pathway	221	3.76	16	1.2e-06	1e-05
macromolecule biosynthetic process	6540	111	148	1.32e-06	1.07e-05
macromolecule biosynthetic process	6540	111	148	1.32e-06	1.07e-05
regulation of protein metabolic process	1820	31	58	1.32e-06	1.07e-05
regulation of nucleocytoplasmic transport	172	2.93	14	1.42e-06	1.13e-05
epithelial cell differentiation	339	5.77	20	1.42e-06	1.13e-05
cellular response to extracellular stimulus	149	2.53	13	1.56e-06	1.22e-05
leukocyte differentiation	404	6.87	22	1.58e-06	1.22e-05
negative regulation of apoptotic process	679	11.5	30	1.59e-06	1.22e-05
negative regulation of apoptotic process	679	11.5	30	1.59e-06	1.22e-05
cell development	1840	31.4	58	1.84e-06	1.4e-05
vasculature development	652	11.1	29	2.11e-06	1.59e-05
negative regulation of programmed cell death	691	11.8	30	2.27e-06	1.69e-05
negative regulation of cell proliferation	585	9.95	27	2.44e-06	1.81e-05
anatomical structure morphogenesis	2820	47.9	78	2.72e-06	1.99e-05
chromatin remodeling	111	1.89	11	2.91e-06	2.11e-05
regulation of cellular protein metabolic process	1560	26.5	51	2.95e-06	2.12e-05
regulation of anatomical structure morphogenesis	702	11.9	30	3.12e-06	2.23e-05
regulation of protein import into nucleus	137	2.33	12	3.8e-06	2.68e-05
positive regulation of cell proliferation	786	13.4	32	3.95e-06	2.76e-05
female pregnancy	162	2.76	13	3.98e-06	2.76e-05
negative regulation of developmental process	674	11.5	29	4.05e-06	2.79e-05
regulation of immune system process	1190	20.3	42	4.49e-06	3.07e-05
P.Values are raw p value from hypergeometric tests. FDR (false discovery rate) is not suit for P.Value as these pathways or biological processes are non-independent and correlated to each other.
