# Supplementary material for: MicroRNA-29c Acting on FOS Plays a Significant Role in Nonalcoholic Steatohepatitis Through the Interleukin-17 Signaling Pathway
Source: Front Physiol. 2021 Apr 1;12:597449. doi: 10.3389/fphys.2021.597449 (PMC8078210; doi:10.3389/fphys.2021.597449)
Supplement: Supplementary file 2 [file Table_2.XLSX]

## Sheet: Additional files1Table.S2
Table.S2： Gene ontology cellular component analysis result.
Pathway	Total	Expected	Hits	P.Value	FDR
nucleoplasm	1820	27.6	97	1.19e-30	2.68e-28
nuclear lumen	2690	40.7	112	1.25e-26	1.4e-24
membrane-enclosed lumen	3440	52.1	126	1.95e-25	1.47e-23
organelle lumen	3380	51.2	124	5.91e-25	3.33e-23
transcription factor complex	303	4.58	38	4.21e-24	1.89e-22
nuclear part	3330	50.4	120	3.04e-23	1.14e-21
nucleoplasm part	910	13.8	59	4.8e-22	1.54e-20
nucleus	7600	115	183	1.91e-18	5.38e-17
nuclear chromatin	159	2.4	20	3.55e-13	8.88e-12
chromatin	326	4.93	25	2.85e-11	6.41e-10
nuclear chromosome part	273	4.13	22	1.8e-10	3.69e-09
protein complex	4050	61.3	105	7.52e-10	1.41e-08
nuclear chromosome	320	4.84	22	3.61e-09	5.89e-08
macromolecular complex	4800	72.5	116	3.66e-09	5.89e-08
chromosomal part	670	10.1	31	3.04e-08	4.56e-07
chromosome	784	11.9	31	9.64e-07	1.35e-05
cytosol	2660	40.3	70	1.25e-06	1.65e-05
DNA-directed RNA polymerase II, holoenzyme	93	1.41	8	8.21e-05	0.00103
intracellular organelle part	8620	130	159	0.000151	0.00179
nuclear body	295	4.46	14	0.000166	0.00187
DNA-directed RNA polymerase complex	105	1.59	8	0.000192	0.00197
nuclear DNA-directed RNA polymerase complex	105	1.59	8	0.000192	0.00197
RNA polymerase complex	106	1.6	8	0.000206	0.00201
transcription factor TFIID complex	21	0.317	4	0.000249	0.00234
organelle part	8790	133	160	0.000329	0.00296
nuclear matrix	87	1.32	7	0.000347	0.003
PML body	77	1.16	6	0.00109	0.00907
non-membrane-bounded organelle	3940	59.6	81	0.00123	0.00957
intracellular non-membrane-bounded organelle	3940	59.6	81	0.00123	0.00957
nuclear membrane	207	3.13	9	0.00433	0.0324
nucleolus	652	9.86	19	0.00492	0.0357
perinuclear region of cytoplasm	475	7.18	15	0.00592	0.0416
histone deacetylase complex	53	0.801	4	0.00836	0.057
extrinsic to membrane	135	2.04	6	0.0168	0.111
cell cortex	195	2.95	7	0.029	0.186
intercalated disc	45	0.68	3	0.0304	0.19
neuron projection	685	10.4	17	0.0314	0.191
nuclear envelope	387	5.85	11	0.0338	0.2
dendrite	342	5.17	10	0.0356	0.201
cytosolic part	204	3.08	7	0.0357	0.201
adherens junction	212	3.2	7	0.0425	0.233
P.Values are raw p value from hypergeometric tests. FDR (false discovery rate) is not suit for P.Value as these pathways or biological processes are non-independent and correlated to each other.
