# Supplementary material for: MicroRNA-29c Acting on FOS Plays a Significant Role in Nonalcoholic Steatohepatitis Through the Interleukin-17 Signaling Pathway
Source: Front Physiol. 2021 Apr 1;12:597449. doi: 10.3389/fphys.2021.597449 (PMC8078210; doi:10.3389/fphys.2021.597449)
Supplement: Supplementary file 3 [file Table_3.XLSX]

## Sheet: Additional files1Table.S3
Table.S3：Gene ontology molecular function analysis result.
Pathway	Total	Expected	Hits	P.Value	FDR
transcription factor binding	509	8.26	57	4.4e-32	1.71e-29
transcription from RNA polymerase II promoter	1930	31.3	103	5.34e-31	1.04e-28
positive regulation of transcription, DNA-dependent	1260	20.4	78	1.23e-26	1.6e-24
sequence-specific DNA binding	732	11.9	56	4.59e-23	4.45e-21
protein binding transcription factor activity	600	9.74	47	9.8e-20	7.6e-18
transcription cofactor activity	552	8.96	45	1.4e-19	9.02e-18
negative regulation of transcription, DNA-dependent	987	16	58	2.59e-18	1.44e-16
transcription coactivator activity	312	5.06	32	6.03e-17	2.92e-15
enzyme binding	1200	19.5	61	2.9e-16	1.25e-14
DNA binding	2760	44.8	95	1.77e-14	6.88e-13
chromatin binding	338	5.49	28	1.28e-12	4.53e-11
kinase binding	418	6.78	29	3.95e-11	1.28e-09
structure-specific DNA binding	242	3.93	22	6.26e-11	1.87e-09
RNA polymerase II distal enhancer sequence-specific DNA binding transcription factor activity	110	1.79	15	2.73e-10	7.58e-09
double-stranded DNA binding	149	2.42	17	3.02e-10	7.8e-09
nuclear hormone receptor binding	153	2.48	17	4.59e-10	1.11e-08
protein kinase binding	376	6.1	25	2.32e-09	5.29e-08
hormone receptor binding	176	2.86	17	4.04e-09	8.7e-08
steroid hormone receptor binding	69	1.12	11	1.3e-08	2.65e-07
protein dimerization activity	996	16.2	34	2.93e-05	0.000569
transcription corepressor activity	208	3.38	13	3.55e-05	0.000656
thyroid hormone receptor binding	29	0.471	5	9.32e-05	0.00164
phosphatase binding	116	1.88	9	0.000113	0.00183
SMAD binding	68	1.1	7	0.000113	0.00183
RNA polymerase II transcription cofactor activity	73	1.18	7	0.000178	0.00276
histone acetyltransferase activity	52	0.844	6	0.000187	0.00279
protein C-terminus binding	160	2.6	10	0.000285	0.00409
ligand-activated sequence-specific DNA binding RNA polymerase II transcription factor activity	57	0.925	6	0.000311	0.00421
phosphatase regulator activity	80	1.3	7	0.000315	0.00421
N-acetyltransferase activity	82	1.33	7	0.000367	0.00474
identical protein binding	910	14.8	29	0.000381	0.00476
protein N-terminus binding	86	1.4	7	0.000491	0.00595
histone deacetylase binding	65	1.05	6	0.000636	0.00748
N-acyltransferase activity	97	1.57	7	0.00101	0.0115
acetyltransferase activity	99	1.61	7	0.00114	0.0126
receptor binding	1590	25.9	41	0.00189	0.0204
steroid hormone receptor activity	56	0.909	5	0.0021	0.022
protein homodimerization activity	573	9.3	19	0.00257	0.0262
protein heterodimerization activity	374	6.07	14	0.00323	0.0322
protein deacetylase activity	39	0.633	4	0.00356	0.0345
protein complex binding	339	5.5	13	0.00366	0.0347
cytokine receptor binding	266	4.32	11	0.00419	0.0387
protein phosphatase binding	74	1.2	5	0.00701	0.0632
structural constituent of cytoskeleton	78	1.27	5	0.00872	0.0769
deacetylase activity	52	0.844	4	0.00995	0.0858
magnesium ion binding	188	3.05	8	0.0117	0.099
protein domain specific binding	560	9.09	16	0.0205	0.169
insulin-like growth factor receptor binding	14	0.227	2	0.021	0.17
protein serine/threonine kinase activity	572	9.28	16	0.0244	0.193
MAP kinase activity	16	0.26	2	0.0271	0.21
actin filament binding	71	1.15	4	0.0282	0.215
receptor signaling protein activity	110	1.79	5	0.0335	0.25
hydrolase activity, acting on carbon-nitrogen (but not peptide) bonds, in linear amides	76	1.23	4	0.035	0.256
transferase activity, transferring acyl groups other than amino-acyl groups	193	3.13	7	0.0382	0.274
structural molecule activity	666	10.8	17	0.0438	0.309
protein phosphatase type 2A regulator activity	22	0.357	2	0.049	0.339
P.Values are raw p value from hypergeometric tests. FDR (false discovery rate) is not suit for P.Value as these pathways or biological processes are non-independent and correlated to each other.
