# Supplementary material for: MicroRNA-29c Acting on FOS Plays a Significant Role in Nonalcoholic Steatohepatitis Through the Interleukin-17 Signaling Pathway
Source: Front Physiol. 2021 Apr 1;12:597449. doi: 10.3389/fphys.2021.597449 (PMC8078210; doi:10.3389/fphys.2021.597449)
Supplement: Supplementary file 4 [file Table_4.XLSX]

## Sheet: TargetScan7
Table.S4, results of microRNA sites prediction.
miRNA	Position in the UTR	seed match	context++ score	context++ score percentile	weighted context++ score	conserved branch length	Pct
Conserved sites
hsa-miR-221-3p	203-210	8mer	-0.43	98	-0.43	4.162	0.62
hsa-miR-222-3p	203-210	8mer	-0.43	98	-0.43	4.162	0.62
hsa-miR-149-5p	274-280	7mer-m8	-0.17	90	-0.17	3.068	N/A
hsa-miR-155-5p	325-332	8mer	-0.49	99	-0.49	4.486	0.55
hsa-miR-29a-3p	365-371	7mer-m8	-0.33	94	-0.33	4.501	0.84
hsa-miR-29c-3p	365-371	7mer-m8	-0.33	94	-0.33	4.501	0.84
hsa-miR-29b-3p	365-371	7mer-m8	-0.33	94	-0.33	4.501	0.84
hsa-miR-28-3p	389-395	7mer-m8	-0.13	84	-0.13	3.087	N/A
hsa-miR-3129-5p	415-421	7mer-m8	-0.29	97	-0.29	4.157	0.65
hsa-miR-199b-3p	415-421	7mer-m8	-0.34	96	-0.34	4.157	0.65
hsa-miR-199a-3p	415-421	7mer-m8	-0.34	96	-0.34	4.157	0.65
hsa-miR-5590-3p	483-489	7mer-m8	-0.14	95	-0.14	3.009	0.13
hsa-miR-142-5p	483-489	7mer-m8	-0.09	90	-0.09	3.009	0.13
hsa-miR-101-3p.1	524-531	8mer	-0.52	99	-0.51	4.369	0.73
hsa-miR-101-3p.2	525-531	7mer-m8	-0.18	94	-0.17	4.369	0.33
hsa-miR-144-3p	525-531	7mer-1A	-0.15	89	-0.14	4.369	0.33
hsa-miR-139-5p	526-532	7mer-m8	-0.3	97	-0.3	4.004	0.19
hsa-miR-802	563-570	8mer	-0.41	99	-0.4	2.711	0.11
hsa-miR-383-5p.1	567-573	7mer-1A	-0.29	94	-0.29	4.445	< 0.1
hsa-miR-4262	592-598	7mer-m8	-0.17	94	-0.17	4.195	0.69
hsa-miR-181a-5p	592-598	7mer-m8	-0.18	90	-0.18	4.195	0.69
hsa-miR-181d-5p	592-598	7mer-m8	-0.18	90	-0.18	4.195	0.69
hsa-miR-181b-5p	592-598	7mer-m8	-0.18	90	-0.18	4.195	0.69
hsa-miR-181c-5p	592-598	7mer-m8	-0.18	90	-0.18	4.195	0.69
Poorly conserved sites
hsa-miR-6829-3p	15-21	7mer-1A	-0.13	86	-0.13	0	N/A
hsa-miR-6836-3p	15-21	7mer-m8	-0.16	84	-0.16	0	N/A
hsa-miR-6791-3p	15-21	7mer-1A	-0.12	84	-0.12	0	N/A
hsa-miR-6778-3p	15-21	7mer-1A	-0.08	62	-0.08	0	N/A
hsa-miR-6882-3p	17-23	7mer-m8	-0.11	70	-0.11	0	N/A
hsa-miR-6741-5p	26-32	7mer-m8	-0.08	82	-0.08	0	N/A
hsa-miR-6748-5p	27-34	8mer	-0.28	90	-0.28	0	N/A
hsa-miR-6759-5p	28-35	8mer	-0.25	94	-0.25	0	N/A
hsa-miR-6793-5p	28-34	7mer-1A	-0.07	58	-0.07	0	N/A
hsa-miR-4296	29-35	7mer-1A	-0.13	79	-0.13	0	N/A
hsa-miR-4322	29-35	7mer-1A	-0.09	74	-0.09	0	N/A
hsa-miR-4265	29-35	7mer-1A	-0.1	74	-0.1	0	N/A
hsa-miR-6796-5p	29-35	7mer-1A	-0.11	66	-0.11	0	N/A
hsa-miR-6500-3p	32-38	7mer-m8	-0.02	44	-0.02	0	N/A
hsa-miR-183-5p.2	35-41	7mer-m8	-0.2	86	-0.2	0.991	< 0.1
hsa-miR-891a-3p	36-42	7mer-m8	-0.25	94	-0.25	0	N/A
hsa-miR-5693	38-44	7mer-m8	-0.1	88	-0.1	0	N/A
hsa-miR-449a	40-46	7mer-m8	-0.2	79	-0.2	1.667	< 0.1
hsa-miR-449b-5p	40-46	7mer-m8	-0.19	75	-0.19	1.667	< 0.1
hsa-miR-34a-5p	40-46	7mer-m8	-0.18	74	-0.18	1.667	< 0.1
hsa-miR-34c-5p	40-46	7mer-m8	-0.16	68	-0.16	1.667	< 0.1
hsa-miR-7112-5p	42-49	8mer	-0.56	98	-0.56	0	N/A
hsa-miR-4267	48-54	7mer-m8	-0.26	96	-0.26	0	N/A
hsa-miR-1226-3p	50-56	7mer-m8	-0.22	92	-0.22	0.043	N/A
hsa-miR-767-5p	52-58	7mer-1A	-0.09	75	-0.09	0.25	N/A
hsa-miR-502-3p	53-59	7mer-m8	-0.3	96	-0.3	2.224	N/A
hsa-miR-501-3p	53-59	7mer-m8	-0.31	96	-0.31	2.224	N/A
hsa-miR-5700	55-61	7mer-1A	-0.02	55	-0.02	0.137	N/A
hsa-miR-3607-3p	59-65	7mer-1A	-0.13	89	-0.13	0	N/A
hsa-miR-3686	59-65	7mer-m8	-0.07	63	-0.07	0.223	N/A
hsa-miR-6817-3p	62-68	7mer-m8	-0.22	95	-0.22	0	N/A
hsa-miR-6769b-3p	63-70	8mer	-0.46	99	-0.46	0	N/A
hsa-miR-3183	63-70	8mer	-0.34	98	-0.34	0	N/A
hsa-miR-4723-3p	63-70	8mer	-0.42	98	-0.42	0	N/A
hsa-miR-7111-3p	64-70	7mer-m8	-0.26	95	-0.26	0.223	N/A
hsa-miR-6854-3p	65-76	non-canonical	N/A	N/A	N/A	0	N/A
hsa-miR-6854-3p	65-76	non-canonical	N/A	N/A	N/A	0	N/A
hsa-miR-4279	66-73	8mer	-0.43	99	-0.43	0	N/A
hsa-miR-629-3p	68-74	7mer-1A	-0.09	87	-0.09	0	N/A
hsa-miR-576-3p	75-81	7mer-m8	-0.16	87	-0.16	0	N/A
hsa-miR-9500	80-87	8mer	-0.32	98	-0.32	0	N/A
hsa-miR-6750-5p	81-87	7mer-1A	-0.06	79	-0.06	0	N/A
hsa-miR-6822-5p	81-87	7mer-1A	-0.06	79	-0.06	0	N/A
hsa-miR-5584-5p	81-87	7mer-1A	-0.07	73	-0.07	0	N/A
hsa-miR-3914	91-97	7mer-m8	-0.18	89	-0.18	0	N/A
hsa-miR-873-5p.1	92-98	7mer-m8	-0.07	91	-0.07	0.992	N/A
hsa-miR-4700-3p	94-100	7mer-1A	-0.09	81	-0.09	0	N/A
hsa-miR-139-5p	96-102	7mer-1A	-0.08	80	-0.08	1.236	< 0.1
hsa-miR-3618	97-103	7mer-m8	-0.12	50	-0.12	0	N/A
hsa-miR-6749-3p	107-113	7mer-m8	-0.21	85	-0.21	0	N/A
hsa-miR-3974	112-118	7mer-1A	-0.19	87	-0.19	0.031	N/A
hsa-miR-3650	131-138	8mer	-0.38	97	-0.38	0	N/A
hsa-miR-7978	133-139	7mer-m8	-0.11	82	-0.11	0	N/A
hsa-miR-5008-5p	145-152	8mer	-0.45	98	-0.45	0	N/A
hsa-miR-6089	146-152	7mer-1A	-0.11	86	-0.11	0	N/A
hsa-miR-6765-5p	147-153	7mer-1A	-0.15	92	-0.15	0.223	N/A
hsa-miR-1304-5p	147-153	7mer-m8	-0.15	83	-0.15	0	N/A
hsa-miR-26b-5p	156-162	7mer-1A	-0.1	82	-0.1	1.934	N/A
hsa-miR-26a-5p	156-162	7mer-1A	-0.1	82	-0.1	1.934	N/A
hsa-miR-1297	156-162	7mer-1A	-0.1	82	-0.1	1.934	N/A
hsa-miR-4465	156-162	7mer-1A	-0.11	82	-0.11	1.934	N/A
hsa-miR-498	157-163	7mer-1A	-0.02	69	-0.02	0.043	N/A
hsa-miR-3160-5p	160-166	7mer-1A	-0.06	74	-0.06	0	N/A
hsa-miR-490-5p	166-172	7mer-m8	-0.14	86	-0.14	0.031	N/A
hsa-miR-4802-3p	167-173	7mer-m8	-0.15	86	-0.15	0	N/A
hsa-miR-4717-3p	168-174	7mer-m8	-0.21	94	-0.21	0	N/A
hsa-miR-4643	169-175	7mer-m8	-0.02	60	-0.02	0	N/A
hsa-miR-937-5p	177-183	7mer-1A	-0.11	83	-0.11	0	N/A
hsa-miR-8081	177-183	7mer-m8	-0.07	70	-0.07	0	N/A
hsa-miR-627-5p	177-183	7mer-1A	-0.04	63	-0.04	0.043	N/A
hsa-miR-8083	182-188	7mer-m8	-0.08	75	-0.08	0.137	N/A
hsa-miR-8080	184-190	7mer-1A	-0.13	88	-0.13	0	N/A
hsa-miR-6816-3p	184-190	7mer-1A	-0.06	78	-0.06	0.306	N/A
hsa-miR-6077	192-198	7mer-m8	-0.04	72	-0.04	0	N/A
hsa-miR-187-5p	204-210	7mer-1A	-0.19	93	-0.19	0.5	N/A
hsa-miR-548v	204-210	7mer-1A	-0.18	82	-0.18	0	N/A
hsa-miR-5089-3p	205-211	7mer-1A	-0.19	85	-0.19	0.223	N/A
hsa-miR-6885-3p	207-213	7mer-1A	-0.11	88	-0.11	0	N/A
hsa-miR-19b-1-5p	208-214	7mer-m8	-0.12	87	-0.12	0.322	N/A
hsa-miR-19a-5p	208-214	7mer-m8	-0.12	87	-0.12	0.322	N/A
hsa-miR-19b-2-5p	208-214	7mer-m8	-0.11	85	-0.11	0.322	N/A
hsa-miR-6854-3p	211-217	7mer-1A	-0.2	73	-0.2	0	N/A
hsa-miR-5581-3p	215-221	7mer-m8	-0.21	92	-0.21	0	N/A
hsa-miR-6872-3p	215-221	7mer-1A	-0.1	68	-0.1	0	N/A
hsa-miR-603	221-228	8mer	-0.23	98	-0.23	0.031	N/A
hsa-miR-3941	222-228	7mer-m8	-0.12	86	-0.12	0	N/A
hsa-miR-362-3p	222-228	7mer-1A	-0.04	74	-0.04	2.764	N/A
hsa-miR-8485	222-228	7mer-1A	-0.09	71	-0.09	0	N/A
hsa-miR-329-3p	222-228	7mer-1A	-0.03	67	-0.03	2.764	N/A
hsa-miR-1292-5p	231-237	7mer-1A	-0.13	81	-0.13	0.187	N/A
hsa-miR-4471	231-237	7mer-1A	-0.11	70	-0.11	0	N/A
hsa-miR-8059	231-237	7mer-1A	-0.07	68	-0.07	0	N/A
hsa-miR-204-3p	232-238	7mer-m8	-0.14	94	-0.14	0.159	N/A
hsa-miR-4646-5p	232-238	7mer-m8	-0.18	93	-0.18	0.159	N/A
hsa-miR-653-3p	235-241	7mer-m8	-0.13	88	-0.13	0.031	N/A
hsa-miR-668-3p	237-243	7mer-1A	-0.02	50	-0.02	2.879	N/A
hsa-miR-597-5p	238-244	7mer-m8	-0.26	93	-0.26	0.25	N/A
hsa-miR-573	242-248	7mer-m8	-0.13	84	-0.13	0.031	N/A
hsa-miR-3616-5p	242-248	7mer-m8	-0.12	82	-0.12	0.031	N/A
hsa-miR-4795-5p	242-248	7mer-1A	-0.12	75	-0.12	0	N/A
hsa-miR-146a-3p	245-252	8mer	-0.2	93	-0.2	0	N/A
hsa-miR-4653-5p	246-252	7mer-1A	-0.1	80	-0.1	0	N/A
hsa-miR-301a-5p	246-252	7mer-1A	-0.03	79	-0.03	0.031	N/A
hsa-miR-301b-5p	246-252	7mer-1A	-0.03	79	-0.03	0.031	N/A
hsa-miR-3921	246-252	7mer-1A	-0.09	78	-0.09	0	N/A
hsa-miR-6817-3p	247-253	7mer-m8	-0.12	83	-0.12	0	N/A
hsa-miR-4267	251-257	7mer-m8	-0.28	97	-0.28	0	N/A
hsa-miR-634	253-259	7mer-1A	-0.24	93	-0.24	0.016	N/A
hsa-miR-606	257-263	7mer-1A	-0.09	75	-0.09	0.016	N/A
hsa-miR-4637	259-266	8mer	-0.29	96	-0.29	0	N/A
hsa-miR-5089-3p	263-269	7mer-m8	-0.22	89	-0.22	0	N/A
hsa-miR-24-3p	273-279	7mer-1A	-0.1	78	-0.1	2.793	< 0.1
hsa-miR-4284	273-279	7mer-1A	-0.01	34	-0.01	0	N/A
hsa-miR-4650-5p	279-285	7mer-m8	-0.11	84	-0.11	0.159	N/A
hsa-miR-4311	294-300	7mer-m8	-0.02	52	-0.02	0	N/A
hsa-miR-4311	301-307	7mer-m8	-0.07	92	-0.07	0	N/A
hsa-miR-4428	307-314	8mer	-0.4	99	-0.4	0.234	N/A
hsa-miR-3173-3p	308-314	7mer-1A	-0.18	89	-0.18	0.043	N/A
hsa-miR-6891-5p	308-314	7mer-1A	-0.17	87	-0.17	0.043	N/A
hsa-miR-4521	309-315	7mer-m8	-0.18	93	-0.18	0.483	N/A
hsa-miR-1253	316-323	8mer	-0.34	98	-0.34	0.016	N/A
hsa-miR-6770-5p	317-323	7mer-1A	-0.13	84	-0.13	0	N/A
hsa-miR-4712-3p	319-325	7mer-1A	-0.18	91	-0.18	0	N/A
hsa-miR-31-3p	322-328	7mer-1A	-0.18	86	-0.18	0.26	N/A
hsa-miR-569	327-333	7mer-m8	-0.19	93	-0.19	0.043	N/A
hsa-miR-323b-3p	351-357	7mer-1A	-0.1	83	-0.1	0.031	N/A
hsa-miR-4733-3p	363-369	7mer-m8	-0.24	94	-0.24	0.223	N/A
hsa-miR-3065-3p	366-372	7mer-m8	-0.29	96	-0.29	0.26	N/A
hsa-miR-338-3p	368-374	7mer-1A	-0.17	93	-0.17	3.113	0.27
hsa-miR-4530	368-374	7mer-1A	-0.13	84	-0.13	0	N/A
hsa-miR-5586-5p	369-376	8mer	-0.47	99	-0.47	0.306	N/A
hsa-miR-510-3p	378-384	7mer-1A	-0.01	43	-0.01	0	N/A
hsa-miR-7849-3p	383-389	7mer-1A	-0.04	88	-0.04	0	N/A
hsa-miR-4666a-3p	384-390	7mer-m8	-0.04	82	-0.04	0	N/A
hsa-miR-4793-3p	393-399	7mer-m8	-0.22	95	-0.22	0.26	N/A
hsa-miR-1207-3p	397-403	7mer-1A	-0.13	85	-0.13	0.902	N/A
hsa-miR-34a-3p	399-405	7mer-m8	-0.29	97	-0.29	0.483	N/A
hsa-miR-4668-3p	402-408	7mer-1A	-0.01	56	-0.01	0	N/A
hsa-miR-2053	406-412	7mer-1A	-0.11	96	-0.11	0	N/A
hsa-miR-5701	409-415	7mer-1A	-0.08	81	-0.08	0	N/A
hsa-miR-101-5p	412-418	7mer-1A	-0.1	87	-0.1	0.306	N/A
hsa-miR-1244	414-420	7mer-m8	-0.24	93	-0.24	0.043	N/A
hsa-miR-873-5p.1	423-429	7mer-m8	-0.18	97	-0.18	2.558	N/A
hsa-miR-5006-5p	426-433	8mer	-0.55	99	-0.55	0	N/A
hsa-miR-4755-3p	426-432	7mer-1A	-0.19	84	-0.19	0	N/A
hsa-miR-1202	427-433	7mer-1A	-0.11	86	-0.11	0.016	N/A
hsa-miR-3972	427-433	7mer-1A	-0.12	80	-0.12	0.016	N/A
hsa-miR-603	435-441	7mer-m8	-0.18	96	-0.18	0.243	N/A
hsa-miR-589-3p	439-446	8mer	-0.29	98	-0.29	0	N/A
hsa-miR-2115-3p	441-447	7mer-m8	-0.11	81	-0.11	0.575	N/A
hsa-miR-34a-3p	443-449	7mer-1A	-0.11	86	-0.11	0.483	N/A
hsa-miR-576-5p	446-453	8mer	-0.18	97	-0.18	0.031	N/A
hsa-miR-4263	447-453	7mer-1A	-0.04	78	-0.04	0	N/A
hsa-miR-5587-5p	454-460	7mer-1A	-0.2	90	-0.2	0	N/A
hsa-miR-5692c	460-467	8mer	-0.17	97	-0.17	0	N/A
hsa-miR-5692b	460-467	8mer	-0.17	97	-0.17	0	N/A
hsa-miR-369-3p	461-467	7mer-1A	-0.05	87	-0.05	0.023	N/A
hsa-miR-374a-5p	461-467	7mer-m8	-0.06	86	-0.06	0.023	N/A
hsa-miR-374b-5p	461-467	7mer-m8	-0.07	84	-0.07	0.023	N/A
hsa-miR-627-3p	471-478	8mer	-0.27	97	-0.27	0.306	N/A
hsa-miR-6506-3p	477-483	7mer-1A	-0.38	92	-0.38	0	N/A
hsa-miR-489-5p	478-484	7mer-m8	-0.38	89	-0.38	0	N/A
hsa-miR-6507-3p	482-488	7mer-1A	-0.13	88	-0.13	0	N/A
hsa-miR-7159-3p	500-506	7mer-1A	-0.06	80	-0.06	0	N/A
hsa-miR-4482-3p	500-506	7mer-1A	-0.04	78	-0.04	0	N/A
hsa-miR-7705	512-518	7mer-1A	-0.18	89	-0.18	0	N/A
hsa-miR-3201	516-522	7mer-1A	-0.14	85	-0.14	0.223	N/A
hsa-miR-4791	516-522	7mer-1A	-0.17	83	-0.17	0.223	N/A
hsa-miR-490-5p	518-524	7mer-m8	-0.27	97	-0.27	0.815	N/A
hsa-miR-4802-3p	519-526	8mer	-0.43	99	-0.43	0.223	N/A
hsa-miR-942-3p	520-526	7mer-1A	-0.13	83	-0.12	0.223	N/A
hsa-miR-548aj-3p	531-537	7mer-m8	-0.07	95	-0.06	0.031	N/A
hsa-miR-548x-3p	531-537	7mer-m8	-0.07	95	-0.06	0.031	N/A
hsa-miR-548ah-3p	531-537	7mer-m8	-0.05	93	-0.05	0.031	N/A
hsa-miR-548am-3p	531-537	7mer-m8	-0.05	93	-0.05	0.031	N/A
hsa-miR-548j-3p	531-537	7mer-m8	-0.05	93	-0.05	0.031	N/A
hsa-miR-548ae-3p	531-537	7mer-m8	-0.05	93	-0.05	0.031	N/A
hsa-miR-548aq-3p	531-537	7mer-m8	-0.05	93	-0.05	0.031	N/A
hsa-miR-3185	536-542	7mer-1A	-0.12	89	-0.12	0	N/A
hsa-miR-4709-3p	537-543	7mer-1A	-0.14	90	-0.14	0.137	N/A
hsa-miR-323a-3p	558-564	7mer-m8	-0.2	97	-0.19	2.102	N/A
hsa-miR-3143	560-566	7mer-m8	-0.08	83	-0.08	0	N/A
hsa-miR-543	560-566	7mer-1A	-0.03	78	-0.02	2.128	N/A
hsa-miR-545-5p	564-570	7mer-1A	-0.13	85	-0.12	0.217	N/A
hsa-miR-4772-5p	567-573	7mer-1A	-0.21	87	-0.21	0.223	N/A
hsa-miR-6076	571-577	7mer-1A	-0.14	85	-0.14	0	N/A
hsa-miR-6797-3p	571-577	7mer-1A	-0.1	83	-0.1	0	N/A
hsa-miR-5700	573-579	7mer-m8	-0.07	81	-0.07	0.137	N/A
hsa-miR-3065-5p	578-584	7mer-1A	-0.11	83	-0.11	0.226	N/A
hsa-miR-7159-5p	578-584	7mer-m8	-0.04	57	-0.04	0.159	N/A
hsa-miR-892c-5p	590-596	7mer-m8	-0.06	68	-0.06	0.287	N/A
hsa-miR-543	593-599	7mer-m8	-0.1	93	-0.1	2.77	N/A
hsa-miR-589-3p	596-603	8mer	-0.31	98	-0.3	0.223	N/A
hsa-miR-513b-3p	601-608	8mer	-0.29	98	-0.29	0	N/A
hsa-miR-569	604-611	8mer	-0.28	98	-0.27	0.043	N/A
hsa-miR-2053	605-611	7mer-m8	-0.02	67	-0.02	0	N/A
hsa-miR-548g-3p	609-615	7mer-m8	-0.12	92	-0.12	0	N/A
hsa-miR-548ar-3p	610-616	7mer-m8	-0.07	90	-0.07	0.17	N/A
hsa-miR-548f-3p	610-616	7mer-m8	-0.06	88	-0.06	0.17	N/A
hsa-miR-548az-3p	610-616	7mer-m8	-0.06	88	-0.06	0.17	N/A
hsa-miR-548a-3p	610-616	7mer-m8	-0.06	87	-0.06	0.17	N/A
hsa-miR-548e-3p	610-616	7mer-m8	-0.05	86	-0.05	0.17	N/A
hsa-miR-3148	613-619	7mer-1A	-0.12	92	-0.12	0	N/A
hsa-miR-6124	613-619	7mer-1A	-0.01	49	-0.01	0	N/A
hsa-miR-3688-3p	614-620	7mer-m8	-0.11	85	-0.11	0.223	N/A
hsa-miR-490-5p	616-622	7mer-1A	-0.17	91	-0.17	0.852	N/A
hsa-miR-335-3p	619-625	7mer-m8	-0.02	61	-0.02	0.239	N/A
hsa-miR-424-3p	625-632	8mer	-0.45	98	-0.44	0.217	N/A
hsa-miR-548ad-3p	626-632	7mer-1A	-0.17	91	-0.16	0	N/A
hsa-miR-95-5p	629-635	7mer-m8	-0.1	85	-0.1	0.031	N/A
hsa-miR-548aq-3p	637-643	7mer-1A	-0.06	93	-0.06	0.031	N/A
hsa-miR-548ae-3p	637-643	7mer-1A	-0.06	93	-0.06	0.031	N/A
hsa-miR-548ah-3p	637-643	7mer-1A	-0.05	92	-0.05	0.031	N/A
hsa-miR-548am-3p	637-643	7mer-1A	-0.05	92	-0.05	0.031	N/A
hsa-miR-548j-3p	637-643	7mer-1A	-0.05	92	-0.05	0.031	N/A
hsa-miR-548aj-3p	637-643	7mer-1A	-0.04	91	-0.04	0.031	N/A
hsa-miR-548x-3p	637-643	7mer-1A	-0.04	91	-0.04	0.031	N/A
hsa-miR-548ac	637-643	7mer-1A	-0.02	77	-0.02	0.175	N/A
hsa-miR-548z	637-643	7mer-1A	-0.01	57	-0.01	0.175	N/A
hsa-miR-548bb-3p	637-643	7mer-1A	-0.01	57	-0.01	0.175	N/A
hsa-miR-548d-3p	637-643	7mer-1A	-0.01	57	-0.01	0.175	N/A
hsa-miR-548h-3p	637-643	7mer-1A	-0.01	57	-0.01	0.175	N/A
hsa-miR-5692a	646-652	7mer-1A	-0.01	56	-0.01	0	N/A
hsa-miR-7151-5p	657-663	7mer-m8	-0.25	97	-0.24	0	N/A
hsa-miR-580-3p	662-668	7mer-m8	-0.13	92	-0.13	0.016	N/A
hsa-miR-4251	663-670	8mer	-0.41	99	-0.4	0	N/A
hsa-miR-6761-5p	664-670	7mer-1A	-0.15	91	-0.15	0.322	N/A
hsa-miR-4329	664-670	7mer-1A	-0.14	91	-0.13	0	N/A
hsa-miR-3200-5p	665-672	8mer	-0.5	99	-0.49	0	N/A
hsa-miR-548c-3p	678-684	7mer-1A	-0.01	57	-0.01	0.17	N/A
hsa-miR-3163	684-690	7mer-m8	-0.07	97	-0.07	0	N/A
hsa-miR-4650-3p	695-701	7mer-m8	-0.28	92	-0.28	0	N/A
hsa-miR-3927-3p	696-702	7mer-m8	-0.32	96	-0.31	0.233	N/A
hsa-miR-6831-5p	696-702	7mer-m8	-0.28	95	-0.27	0.233	N/A
hsa-miR-4761-5p	699-705	7mer-1A	-0.16	86	-0.16	0	N/A
hsa-miR-3692-3p	718-725	8mer	-0.3	97	-0.3	0.031	N/A
hsa-miR-3671	730-736	7mer-1A	-0.12	91	-0.12	0	N/A
hsa-miR-607	730-736	7mer-m8	-0.02	69	-0.02	0	N/A
hsa-miR-1298-5p	734-740	7mer-1A	-0.19	97	-0.18	2.703	N/A
hsa-miR-335-3p	736-743	8mer	-0.18	98	-0.18	0.239	N/A
hsa-miR-3606-3p	741-747	7mer-1A	-0.01	57	-0.01	0	N/A
hsa-miR-513c-3p	741-747	7mer-1A	-0.01	57	-0.01	0	N/A
hsa-miR-513a-3p	741-747	7mer-1A	-0.01	57	-0.01	0	N/A
hsa-miR-4720-3p	745-751	7mer-1A	-0.14	86	-0.14	0	N/A
hsa-miR-4804-3p	745-751	7mer-1A	-0.09	84	-0.09	0	N/A
hsa-miR-432-5p	767-773	7mer-1A	-0.16	86	-0.15	0.25	N/A
hsa-miR-431-5p	769-775	7mer-1A	-0.08	70	-0.08	1.062	N/A
hsa-miR-3140-3p	784-790	7mer-1A	-0.11	84	-0.11	0	N/A
hsa-miR-4272	796-802	7mer-m8	-0.14	94	-0.13	0	N/A
hsa-miR-624-3p	810-816	7mer-m8	-0.14	87	0	0.016	N/A
hsa-miR-4457	811-817	7mer-m8	-0.17	90	0	0	N/A
hsa-miR-1276	817-823	7mer-m8	-0.17	95	0	0.016	N/A
hsa-miR-525-5p	828-834	7mer-1A	-0.14	83	0	0.175	N/A
hsa-miR-3180-5p	828-834	7mer-m8	-0.09	79	0	0	N/A
hsa-miR-520a-5p	828-834	7mer-1A	-0.12	78	0	0.175	N/A
hsa-miR-617	831-837	7mer-m8	-0.3	95	0	0.016	N/A
hsa-miR-8087	833-839	7mer-m8	-0.02	57	0	0	N/A
hsa-miR-3942-3p	847-853	7mer-1A	-0.02	54	0	0	N/A
hsa-miR-6782-3p	851-857	7mer-1A	-0.08	76	0	0	N/A
hsa-miR-369-3p	855-861	7mer-m8	-0.02	73	0	0.512	N/A
hsa-miR-323b-3p	859-865	7mer-1A	-0.08	78	0	0	N/A
hsa-miR-519d-5p	861-867	7mer-1A	-0.12	84	0	0	N/A
hsa-miR-5695	861-867	7mer-1A	-0.1	79	0	0	N/A
hsa-miR-519e-5p	861-867	7mer-m8	-0.09	76	0	0	N/A
hsa-miR-515-5p	861-867	7mer-m8	-0.09	75	0	0	N/A
hsa-miR-6848-3p	864-870	7mer-m8	-0.11	89	0	0	N/A
hsa-miR-6843-3p	864-870	7mer-m8	-0.15	83	0	0	N/A
hsa-miR-3663-5p	865-871	7mer-m8	-0.11	89	0	0	N/A
hsa-miR-582-3p	867-873	7mer-m8	-0.14	86	0	0.031	N/A
hsa-miR-526b-5p	876-882	7mer-1A	-0.09	74	0	0.043	N/A
hsa-miR-1248	878-884	7mer-m8	-0.03	51	0	0.17	N/A
hsa-miR-5088-3p	879-885	7mer-m8	-0.16	88	0	0	N/A
hsa-miR-5690	885-891	7mer-m8	-0.14	90	0	0	N/A
hsa-miR-646	887-893	7mer-m8	-0.1	78	0	0.016	N/A
hsa-miR-4530	889-896	8mer	-0.15	86	0	0	N/A
hsa-miR-338-3p	890-896	7mer-1A	-0.01	36	0	0.134	< 0.1
hsa-miR-766-3p	891-897	7mer-m8	-0.08	76	0	0.016	N/A
hsa-miR-6887-3p	894-900	7mer-m8	-0.18	75	0	0	N/A
hsa-miR-3657	899-906	8mer	-0.2	85	0	0	N/A
hsa-miR-4669	900-906	7mer-1A	-0.07	62	0	0	N/A
hsa-miR-3650	902-908	7mer-m8	-0.02	33	0	0	N/A
hsa-miR-4455	903-909	7mer-m8	-0.03	26	0	0	N/A
hsa-miR-6804-5p	905-911	7mer-m8	-0.1	53	0	0	N/A
hsa-miR-1324	911-918	8mer	-0.15	89	0	0.016	N/A
hsa-miR-383-5p.1	914-920	7mer-m8	-0.02	11	0	0.856	< 0.1
hsa-miR-6892-5p	919-925	7mer-m8	-0.14	80	0	0	N/A
hsa-miR-4475	919-925	7mer-1A	-0.05	71	0	0	N/A
hsa-miR-3161	922-929	8mer	-0.16	93	0	0	N/A
hsa-miR-599	923-930	8mer	-0.03	39	0	1.515	N/A
hsa-miR-6881-3p	929-935	7mer-m8	-0.08	72	0	0	N/A
hsa-miR-877-3p	929-935	7mer-1A	-0.01	28	0	0	N/A
hsa-miR-6852-3p	930-937	8mer	-0.41	97	0	0.223	N/A
hsa-miR-3909	930-937	8mer	-0.4	97	0	0.223	N/A
hsa-miR-676-3p	932-938	7mer-1A	-0.18	90	0	0.016	N/A
hsa-miR-2355-3p	932-938	7mer-m8	-0.14	75	0	0	N/A
hsa-miR-502-5p	936-942	7mer-1A	-0.09	77	0	0.016	N/A
hsa-miR-6736-3p	949-955	7mer-1A	-0.23	94	0	0	N/A
hsa-miR-34a-3p	951-957	7mer-m8	-0.3	97	0	0	N/A
hsa-miR-4668-3p	954-960	7mer-1A	-0.01	56	0	0	N/A
hsa-miR-4799-5p	957-963	7mer-1A	-0.06	87	0	0	N/A
hsa-miR-3910	978-984	7mer-m8	-0.11	85	0	0	N/A
hsa-miR-605-3p	979-985	7mer-m8	-0.15	76	0	0	N/A
hsa-miR-4533	981-987	7mer-1A	-0.1	75	0	0	N/A
hsa-miR-3202	981-987	7mer-1A	-0.06	61	0	0	N/A
hsa-miR-1179	991-998	8mer	-0.25	96	0	0.043	N/A
hsa-miR-936	1005-1011	7mer-m8	-0.15	78	0	0.016	N/A
hsa-miR-2355-5p	1015-1021	7mer-m8	-0.12	77	0	0	N/A
hsa-miR-1247-5p	1019-1026	8mer	-0.5	97	0	0.016	N/A
hsa-miR-4672	1032-1039	8mer	-0.05	68	0	0	N/A
hsa-miR-6768-5p	1032-1038	7mer-1A	-0.01	50	0	0	N/A
hsa-miR-3941	1033-1039	7mer-1A	-0.01	39	0	0	N/A
hsa-miR-466	1033-1039	7mer-1A	-0.01	28	0	0	N/A
hsa-miR-320d	1040-1046	7mer-m8	-0.09	84	0	0.223	N/A
hsa-miR-320c	1040-1046	7mer-m8	-0.09	84	0	0.223	N/A
hsa-miR-320a	1040-1046	7mer-m8	-0.09	84	0	0.223	N/A
hsa-miR-320b	1040-1046	7mer-m8	-0.09	84	0	0.223	N/A
hsa-miR-4429	1040-1046	7mer-m8	-0.09	84	0	0.223	N/A
hsa-miR-188-3p	1047-1054	8mer	-0.36	95	0	0	N/A
hsa-miR-3156-3p	1048-1054	7mer-1A	-0.12	78	0	0	N/A
hsa-miR-1260a	1048-1054	7mer-1A	-0.07	59	0	0.187	N/A
hsa-miR-1260b	1048-1054	7mer-1A	-0.07	59	0	0.187	N/A
hsa-miR-3938	1050-1056	7mer-1A	-0.12	77	0	0.031	N/A
hsa-miR-630	1052-1058	7mer-1A	-0.1	66	0	0.016	N/A
hsa-miR-653-5p	1066-1072	7mer-m8	-0.04	66	0	0.148	N/A
hsa-miR-494-3p	1066-1072	7mer-1A	-0.01	33	0	0.148	N/A
hsa-miR-4724-5p	1069-1075	7mer-1A	-0.04	77	0	0	N/A
hsa-miR-1278	1071-1077	7mer-m8	-0.18	87	0	0.016	N/A
hsa-miR-6068	1076-1082	7mer-m8	-0.26	82	0	0	N/A
hsa-miR-6801-3p	1079-1085	7mer-m8	-0.28	93	0	0	N/A
hsa-miR-6810-3p	1079-1085	7mer-m8	-0.26	91	0	0	N/A
hsa-miR-3679-3p	1082-1089	8mer	-0.42	97	0	0	N/A
hsa-miR-4282	1095-1101	7mer-m8	-0.02	66	0	0	N/A
hsa-miR-3065-5p	1099-1105	7mer-m8	-0.1	79	0	0	N/A
hsa-miR-3529-3p	1100-1106	7mer-m8	-0.11	83	0	0	N/A
hsa-miR-5003-5p	1101-1107	7mer-m8	-0.19	89	0	0	N/A
hsa-miR-585-5p	1104-1111	8mer	-0.46	98	0	0	N/A
hsa-miR-5682	1105-1111	7mer-1A	-0.12	82	0	0.187	N/A
hsa-miR-889-3p	1111-1117	7mer-1A	-0.06	91	0	0.016	N/A
hsa-miR-4680-3p	1117-1124	8mer	-0.28	98	0	0	N/A
hsa-miR-4427	1118-1124	7mer-1A	-0.12	87	0	0	N/A
hsa-miR-5187-3p	1118-1124	7mer-1A	-0.09	87	0	0	N/A
hsa-miR-548o-3p	1126-1132	7mer-1A	-0.09	90	0	0.043	N/A
hsa-miR-1323	1126-1132	7mer-1A	-0.07	88	0	0.043	N/A
hsa-miR-3156-5p	1131-1137	7mer-1A	-0.1	82	0	0	N/A
hsa-miR-3658	1133-1139	7mer-1A	-0.03	58	0	0	N/A
hsa-miR-23a-5p	1140-1146	7mer-m8	-0.29	96	0	0	N/A
hsa-miR-23b-5p	1140-1146	7mer-m8	-0.33	95	0	0	N/A
hsa-miR-4804-3p	1148-1154	7mer-1A	-0.07	79	0	0	N/A
hsa-miR-4720-3p	1148-1154	7mer-1A	-0.09	72	0	0	N/A
hsa-miR-6885-3p	1150-1156	7mer-m8	-0.05	76	0	0	N/A
hsa-miR-4652-3p	1155-1161	7mer-m8	-0.02	58	0	0	N/A
hsa-miR-152-5p	1157-1163	7mer-m8	-0.21	88	0	0.031	N/A
hsa-miR-520d-5p	1167-1173	7mer-m8	-0.02	68	0	0.031	N/A
hsa-miR-524-5p	1167-1173	7mer-m8	-0.02	67	0	0.031	N/A
hsa-let-7c-3p	1169-1175	7mer-m8	-0.13	86	0	0	N/A
hsa-miR-548at-5p	1184-1190	7mer-m8	-0.09	89	0	0	N/A
hsa-miR-580-3p	1193-1199	7mer-m8	-0.13	92	0	0.016	N/A
hsa-miR-758-3p	1197-1203	7mer-1A	-0.01	34	0	0.46	N/A
hsa-miR-5010-3p	1198-1204	7mer-1A	-0.01	46	0	0	N/A
hsa-miR-2113	1198-1204	7mer-1A	-0.01	42	0	0	N/A
hsa-miR-652-5p	1213-1219	7mer-1A	-0.13	83	0	0	N/A
hsa-miR-6732-3p	1213-1219	7mer-1A	-0.03	46	0	0	N/A
hsa-miR-548ax	1223-1229	7mer-1A	-0.07	53	0	0.031	N/A
hsa-miR-548ao-5p	1223-1229	7mer-1A	-0.06	46	0	0.031	N/A
hsa-miR-5585-5p	1223-1229	7mer-1A	-0.01	28	0	0	N/A
hsa-miR-573	1224-1230	7mer-1A	-0.12	82	0	0.031	N/A
hsa-miR-3616-5p	1224-1230	7mer-1A	-0.07	71	0	0.031	N/A
hsa-miR-6847-3p	1233-1239	7mer-1A	-0.09	79	0	0	N/A
hsa-miR-1178-3p	1234-1240	7mer-1A	-0.11	81	0	0.016	N/A
hsa-miR-676-5p	1242-1248	7mer-1A	-0.01	62	0	0	N/A
hsa-miR-382-5p	1262-1268	7mer-m8	-0.1	90	0	0.127	N/A
hsa-miR-191-5p	1277-1284	8mer	-0.48	98	0	0.081	< 0.1
hsa-miR-365a-3p	1287-1293	7mer-1A	-0.05	61	0	0.122	< 0.1
hsa-miR-365b-3p	1287-1293	7mer-1A	-0.05	61	0	0.122	< 0.1
hsa-miR-576-5p	1290-1296	7mer-m8	-0.02	61	0	0.031	N/A
hsa-miR-4699-5p	1295-1301	7mer-m8	-0.02	35	0	0	N/A
hsa-miR-873-5p.2	1299-1305	7mer-m8	-0.15	84	0	0.122	N/A
hsa-miR-6165	1300-1306	7mer-m8	-0.14	85	0	0	N/A
hsa-miR-1287-5p	1316-1323	8mer	-0.22	95	0	0	N/A
hsa-miR-3135b	1317-1323	7mer-1A	-0.09	74	0	0	N/A
hsa-miR-3692-5p	1318-1324	7mer-m8	-0.04	56	0	0	N/A
hsa-miR-370-3p	1319-1325	7mer-m8	-0.02	41	0	0.115	N/A
hsa-miR-6893-3p	1319-1325	7mer-m8	-0.02	31	0	0.115	N/A
hsa-miR-596	1321-1327	7mer-m8	-0.1	87	0	0.016	N/A
hsa-miR-3157-5p	1324-1330	7mer-1A	-0.05	54	0	0	N/A
hsa-miR-5000-5p	1326-1332	7mer-m8	-0.02	48	0	0	N/A
hsa-miR-548au-3p	1329-1335	7mer-m8	-0.07	64	0	0	N/A
hsa-miR-449c-5p	1330-1336	7mer-m8	-0.13	91	0	0	N/A
hsa-miR-34b-5p	1330-1336	7mer-m8	-0.1	88	0	0	N/A
hsa-miR-2682-5p	1330-1336	7mer-m8	-0.07	81	0	0	N/A
hsa-miR-1827	1331-1337	7mer-m8	-0.16	79	0	0.234	N/A
hsa-miR-335-5p	1335-1341	7mer-1A	-0.01	43	0	0.085	N/A
hsa-miR-552-5p	1347-1354	8mer	-0.09	95	0	0	N/A
hsa-miR-4282	1356-1362	7mer-m8	-0.02	66	0	0	N/A
hsa-miR-1234-3p	1363-1369	7mer-m8	-0.19	83	0	0.016	N/A
hsa-miR-7107-5p	1363-1369	7mer-m8	-0.18	81	0	0.016	N/A
hsa-miR-1292-3p	1369-1375	7mer-m8	-0.25	72	0	0	N/A
hsa-miR-4726-5p	1377-1383	7mer-1A	-0.08	47	0	0	N/A
hsa-miR-4640-5p	1377-1383	7mer-1A	-0.02	19	0	0	N/A
hsa-miR-6508-3p	1377-1383	7mer-1A	-0.01	16	0	0	N/A
hsa-miR-3622b-5p	1381-1387	7mer-m8	-0.02	30	0	0	N/A
hsa-miR-7151-3p	1385-1392	8mer	-0.15	87	0	0	N/A
hsa-miR-5095	1385-1392	8mer	-0.16	86	0	0	N/A
hsa-miR-4438	1385-1391	7mer-1A	-0.06	67	0	0	N/A
hsa-miR-619-5p	1385-1396	non-canonical	N/A	N/A	N/A	0	N/A
hsa-miR-619-5p	1385-1396	non-canonical	N/A	N/A	N/A	0	N/A
hsa-miR-6504-3p	1387-1393	7mer-m8	-0.02	47	0	0	N/A
hsa-miR-3159	1390-1397	8mer	-0.03	36	0	0	N/A
hsa-miR-520c-3p	1397-1403	7mer-m8	-0.07	74	0	0.306	< 0.1
hsa-miR-372-3p	1397-1403	7mer-m8	-0.07	74	0	0.306	< 0.1
hsa-miR-520b	1397-1403	7mer-m8	-0.07	74	0	0.306	< 0.1
hsa-miR-302a-3p	1397-1403	7mer-m8	-0.06	72	0	0.306	< 0.1
hsa-miR-302b-3p	1397-1403	7mer-m8	-0.06	72	0	0.306	< 0.1
hsa-miR-302d-3p	1397-1403	7mer-m8	-0.06	72	0	0.306	< 0.1
hsa-miR-302c-3p.1	1397-1403	7mer-m8	-0.06	72	0	0.306	< 0.1
hsa-miR-302e	1397-1403	7mer-m8	-0.05	70	0	0.306	< 0.1
hsa-miR-520e	1397-1403	7mer-m8	-0.05	70	0	0.306	< 0.1
hsa-miR-520a-3p	1397-1403	7mer-m8	-0.05	69	0	0.306	< 0.1
hsa-miR-520d-3p	1397-1403	7mer-m8	-0.05	69	0	0.306	< 0.1
hsa-miR-373-3p	1397-1403	7mer-m8	-0.02	36	0	0.306	< 0.1
hsa-miR-20a-5p	1398-1404	7mer-m8	-0.03	76	0	0.096	< 0.1
hsa-miR-106a-5p	1398-1404	7mer-m8	-0.03	75	0	0.096	< 0.1
hsa-miR-519d-3p	1398-1404	7mer-m8	-0.03	75	0	0.096	< 0.1
hsa-miR-17-5p	1398-1404	7mer-m8	-0.03	75	0	0.096	< 0.1
hsa-miR-526b-3p	1398-1404	7mer-m8	-0.02	62	0	0.096	< 0.1
hsa-miR-93-5p	1398-1404	7mer-m8	-0.02	59	0	0.096	< 0.1
hsa-miR-106b-5p	1398-1404	7mer-m8	-0.02	58	0	0.096	< 0.1
hsa-miR-20b-5p	1398-1404	7mer-m8	-0.02	58	0	0.096	< 0.1
hsa-miR-520h	1399-1405	7mer-m8	-0.02	44	0	0.043	N/A
hsa-miR-520g-3p	1399-1405	7mer-m8	-0.02	44	0	0.043	N/A
hsa-miR-186-3p	1401-1408	8mer	-0.03	66	0	0	N/A
hsa-miR-150-5p	1403-1409	7mer-m8	-0.02	37	0	0.308	< 0.1
hsa-miR-6778-3p	1405-1411	7mer-m8	-0.1	66	0	0	N/A
hsa-miR-1234-3p	1408-1414	7mer-1A	-0.12	64	0	0.016	N/A
hsa-miR-7107-5p	1408-1414	7mer-1A	-0.11	62	0	0.016	N/A
hsa-miR-6747-3p	1414-1420	7mer-m8	-0.02	31	0	0	N/A
hsa-miR-4763-5p	1415-1421	7mer-m8	-0.19	75	0	0	N/A
hsa-miR-4485-5p	1417-1424	8mer	-0.3	93	0	0	N/A
hsa-miR-4454	1421-1427	7mer-1A	-0.17	74	0	0	N/A
hsa-miR-125a-3p	1425-1432	8mer	-0.14	85	0	0.031	N/A
hsa-miR-3934-5p	1426-1432	7mer-1A	-0.06	77	0	0	N/A
hsa-miR-764	1426-1432	7mer-1A	-0.01	51	0	0	N/A
hsa-miR-6848-3p	1445-1451	7mer-m8	-0.04	74	0	0	N/A
hsa-miR-6843-3p	1445-1451	7mer-m8	-0.1	71	0	0	N/A
hsa-miR-3663-5p	1446-1452	7mer-m8	-0.02	35	0	0	N/A
hsa-miR-6131	1447-1453	7mer-m8	-0.09	78	0	0.016	N/A
hsa-miR-484	1451-1457	7mer-1A	-0.03	72	0	0.043	N/A
hsa-miR-3155b	1451-1457	7mer-1A	-0.01	49	0	0.043	N/A
hsa-miR-3155a	1451-1457	7mer-1A	-0.01	48	0	0.043	N/A
hsa-miR-6801-5p	1454-1460	7mer-1A	-0.11	75	0	0	N/A
hsa-miR-5587-5p	1455-1461	7mer-1A	-0.03	52	0	0	N/A
hsa-miR-4781-3p	1458-1464	7mer-m8	-0.06	74	0	0	N/A
hsa-miR-4716-5p	1460-1467	8mer	-0.08	81	0	0	N/A
hsa-miR-136-5p	1463-1469	7mer-1A	-0.04	58	0	0.134	N/A
hsa-miR-519e-5p	1464-1470	7mer-1A	-0.09	77	0	0.031	N/A
hsa-miR-515-5p	1464-1470	7mer-1A	-0.09	76	0	0.031	N/A
hsa-miR-629-3p	1465-1471	7mer-1A	-0.01	45	0	0	N/A
hsa-miR-193b-5p	1469-1475	7mer-m8	-0.08	52	0	0	N/A
hsa-miR-483-5p	1473-1479	7mer-m8	-0.29	91	0	0	N/A
hsa-miR-548u	1476-1482	7mer-1A	-0.05	75	0	0	N/A
hsa-miR-7161-5p	1476-1482	7mer-1A	-0.02	47	0	0	N/A
hsa-miR-3149	1489-1495	7mer-1A	-0.06	76	0	0.016	N/A
hsa-miR-4775	1493-1499	7mer-m8	-0.02	47	0	0	N/A
hsa-miR-590-3p	1493-1499	7mer-1A	-0.01	34	0	0.043	N/A
hsa-miR-4735-5p	1494-1500	7mer-m8	-0.02	33	0	0	N/A
hsa-miR-1911-3p	1500-1506	7mer-m8	-0.29	95	0	0	N/A
hsa-miR-4733-3p	1501-1507	7mer-m8	-0.18	89	0	0	N/A
hsa-miR-767-5p	1511-1517	7mer-1A	-0.06	63	0	0.016	N/A
hsa-miR-501-3p	1512-1518	7mer-m8	-0.18	89	0	0.036	N/A
hsa-miR-502-3p	1512-1518	7mer-m8	-0.18	89	0	0.036	N/A
hsa-miR-5095	1519-1526	8mer	-0.26	94	0	0	N/A
hsa-miR-7151-3p	1519-1526	8mer	-0.23	93	0	0	N/A
hsa-miR-4438	1519-1525	7mer-1A	-0.13	86	0	0	N/A
hsa-miR-6504-3p	1521-1527	7mer-m8	-0.02	47	0	0	N/A
hsa-miR-3159	1524-1531	8mer	-0.05	54	0	0	N/A
hsa-miR-562	1532-1538	7mer-m8	-0.15	89	0	0.016	N/A
hsa-miR-5697	1533-1540	8mer	-0.14	90	0	0	N/A
hsa-miR-26a-5p	1534-1540	7mer-m8	-0.05	67	0	0.062	N/A
hsa-miR-26b-5p	1534-1540	7mer-m8	-0.05	66	0	0.062	N/A
hsa-miR-1297	1534-1540	7mer-m8	-0.02	40	0	0.062	N/A
hsa-miR-4465	1534-1540	7mer-m8	-0.02	38	0	0.062	N/A
hsa-miR-514b-5p	1536-1542	7mer-m8	-0.1	89	0	0	N/A
hsa-miR-513c-5p	1536-1542	7mer-m8	-0.07	83	0	0	N/A
hsa-miR-6877-3p	1540-1546	7mer-m8	-0.07	79	0	0	N/A
hsa-miR-6819-3p	1540-1546	7mer-m8	-0.06	77	0	0	N/A
hsa-miR-6787-3p	1544-1550	7mer-1A	-0.04	71	0	0	N/A
hsa-miR-4421	1548-1555	8mer	-0.23	92	0	0	N/A
hsa-miR-5699-3p	1548-1555	8mer	-0.21	91	0	0	N/A
hsa-miR-6748-3p	1549-1555	7mer-1A	-0.08	68	0	0	N/A
hsa-miR-7152-5p	1550-1557	8mer	-0.1	87	0	0	N/A
hsa-miR-3074-5p	1551-1557	7mer-1A	-0.01	46	0	0	N/A
hsa-miR-8062	1557-1563	7mer-m8	-0.08	80	0	0	N/A
hsa-miR-6513-3p	1560-1566	7mer-1A	-0.14	91	0	0	N/A
hsa-miR-4465	1561-1567	7mer-1A	-0.08	75	0	0.22	N/A
hsa-miR-1297	1561-1567	7mer-1A	-0.06	70	0	0.22	N/A
hsa-miR-26b-5p	1561-1567	7mer-1A	-0.05	64	0	0.22	N/A
hsa-miR-26a-5p	1561-1567	7mer-1A	-0.04	57	0	0.22	N/A
hsa-miR-4740-3p	1568-1574	7mer-1A	-0.2	91	0	0	N/A
hsa-miR-6778-3p	1571-1577	7mer-m8	-0.19	87	0	0	N/A
hsa-miR-1281	1572-1578	7mer-m8	-0.29	84	0	0.016	N/A
hsa-miR-4485-5p	1574-1580	7mer-1A	-0.2	81	0	0	N/A
hsa-miR-4772-3p	1582-1588	7mer-m8	-0.11	88	0	0	N/A
hsa-miR-639	1585-1592	8mer	-0.57	97	0	0	N/A
hsa-miR-584-3p	1590-1596	7mer-1A	-0.01	33	0	0	N/A
hsa-miR-4277	1590-1596	7mer-1A	-0.01	32	0	0	N/A
hsa-miR-4797-3p	1592-1598	7mer-1A	-0.15	87	0	0	N/A
hsa-miR-4264	1592-1598	7mer-1A	-0.05	69	0	0	N/A
hsa-miR-216a-5p	1594-1600	7mer-m8	-0.02	27	0	0.095	< 0.1
hsa-miR-6722-5p	1600-1606	7mer-1A	-0.21	75	0	0	N/A
hsa-miR-652-3p	1601-1607	7mer-m8	-0.31	90	0	0.069	N/A
hsa-miR-106a-3p	1605-1611	7mer-m8	-0.02	39	0	0	N/A
hsa-miR-4295	1607-1613	7mer-m8	-0.02	39	0	0.134	< 0.1
hsa-miR-130a-3p	1607-1613	7mer-m8	-0.02	38	0	0.134	< 0.1
hsa-miR-301b-3p	1607-1613	7mer-m8	-0.02	37	0	0.134	< 0.1
hsa-miR-301a-3p	1607-1613	7mer-m8	-0.02	37	0	0.134	< 0.1
hsa-miR-130b-3p	1607-1613	7mer-m8	-0.02	37	0	0.134	< 0.1
hsa-miR-3666	1607-1613	7mer-m8	-0.02	36	0	0.134	< 0.1
hsa-miR-454-3p	1607-1613	7mer-m8	-0.02	35	0	0.134	< 0.1
hsa-miR-504-3p	1609-1616	8mer	-0.19	90	0	0	N/A
hsa-miR-122-5p	1610-1616	7mer-1A	-0.13	86	0	0.134	< 0.1
hsa-miR-3135b	1612-1618	7mer-m8	-0.16	90	0	0	N/A
hsa-miR-4430	1613-1619	7mer-m8	-0.14	86	0	0	N/A
hsa-miR-3652	1613-1619	7mer-m8	-0.14	85	0	0	N/A
hsa-miR-744-3p	1622-1629	8mer	-0.3	95	0	0	N/A
hsa-miR-6501-5p	1622-1628	7mer-1A	-0.24	86	0	0	N/A
hsa-miR-4423-5p	1622-1628	7mer-1A	-0.12	67	0	0	N/A
hsa-miR-4797-5p	1637-1643	7mer-m8	-0.19	98	0	0	N/A
hsa-miR-5582-3p	1654-1660	7mer-m8	-0.02	82	0	0	N/A
hsa-miR-570-3p	1656-1662	7mer-1A	-0.14	88	0	0	N/A
hsa-miR-3606-5p	1659-1666	8mer	-0.38	98	0	0	N/A
hsa-miR-921	1660-1666	7mer-1A	-0.16	79	0	0	N/A
hsa-miR-4643	1666-1672	7mer-1A	-0.07	88	0	0	N/A
hsa-miR-4789-3p	1666-1672	7mer-1A	-0.12	88	0	0	N/A
hsa-miR-466	1666-1672	7mer-m8	-0.11	86	0	0	N/A
hsa-miR-3613-3p	1676-1682	7mer-m8	-0.02	36	0	0	N/A
hsa-miR-204-5p	1699-1706	8mer	-0.09	78	0	0.202	< 0.1
hsa-miR-211-5p	1699-1706	8mer	-0.09	78	0	0.202	< 0.1
hsa-miR-6832-3p	1699-1705	7mer-1A	-0.01	25	0	0	N/A
hsa-miR-4755-5p	1700-1706	7mer-m8	-0.06	74	0	0	N/A
hsa-miR-5006-3p	1700-1706	7mer-m8	-0.04	65	0	0	N/A
hsa-miR-623	1700-1706	7mer-1A	-0.05	61	0	0	N/A
hsa-miR-6734-3p	1702-1709	8mer	-0.27	94	0	0	N/A
hsa-miR-3667-3p	1703-1709	7mer-1A	-0.01	25	0	0	N/A
hsa-miR-4667-3p	1706-1712	7mer-m8	-0.12	78	0	0	N/A
hsa-miR-4290	1707-1713	7mer-m8	-0.27	87	0	0	N/A
hsa-miR-4687-5p	1708-1715	8mer	-0.3	97	0	0	N/A
hsa-miR-6779-3p	1709-1715	7mer-1A	-0.07	65	0	0	N/A
hsa-miR-129-2-3p	1709-1715	7mer-1A	-0.05	63	0	0.298	< 0.1
hsa-miR-129-1-3p	1709-1715	7mer-1A	-0.05	63	0	0.298	< 0.1
hsa-miR-3651	1710-1716	7mer-m8	-0.17	79	0	0	N/A
hsa-miR-4761-3p	1717-1723	7mer-1A	-0.05	73	0	0	N/A
hsa-miR-7843-5p	1717-1723	7mer-1A	-0.06	69	0	0	N/A
hsa-miR-6735-5p	1717-1723	7mer-1A	-0.06	59	0	0	N/A
hsa-miR-6879-5p	1717-1723	7mer-1A	-0.06	59	0	0	N/A
hsa-miR-4436b-3p	1717-1723	7mer-1A	-0.05	55	0	0	N/A
hsa-miR-4632-5p	1717-1723	7mer-1A	-0.01	33	0	0	N/A
hsa-miR-5191	1720-1726	7mer-m8	-0.12	59	0	0	N/A
hsa-miR-4475	1724-1730	7mer-1A	-0.05	72	0	0	N/A
hsa-miR-6892-5p	1724-1730	7mer-m8	-0.05	47	0	0	N/A
hsa-miR-4477a	1731-1737	7mer-1A	-0.01	46	0	0	N/A
hsa-miR-4729	1734-1740	7mer-m8	-0.07	88	0	0	N/A
hsa-miR-586	1737-1743	7mer-m8	-0.22	94	0	0.016	N/A
hsa-miR-5700	1738-1744	7mer-m8	-0.21	96	0	0	N/A
hsa-miR-497-3p	1745-1751	7mer-m8	-0.22	97	0	0.031	N/A
hsa-miR-3123	1757-1763	7mer-1A	-0.2	97	0	0	N/A
hsa-miR-3925-5p	1757-1763	7mer-1A	-0.12	92	0	0	N/A
hsa-miR-1303	1758-1764	7mer-m8	-0.2	90	0	0.016	N/A
The context++ score for a specific site is the sum of the contribution of 14 features. The context++ score percentile rank is the percentage of sites for this miRNA with a less favorable context++ score. The weighted context++ score accounts for the abundance of each 3'-UTR tandem isoform in which the site exists, as estimated from the UTR profile (a compendium of 3P-seq datasets from the same sp…
